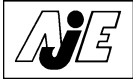

## Original Contribution

# Obesity and Cardiovascular Risk Factors in Korean Children and Adolescents Aged 10–18 Years from the Korean National Health and Nutrition Examination Survey, 1998 and 2001

Hee Man Kim<sup>1,2</sup>, Jong Park<sup>3</sup>, Ho-Seong Kim<sup>4</sup>, Duk Hee Kim<sup>4</sup>, and Sung Hoon Park<sup>1</sup>

<sup>1</sup> Division of Health and Hygiene, Gwangju City Hall, Gwangju, Republic of Korea.

<sup>2</sup> Management Center for Health Promotion, Gwangju, Republic of Korea.

<sup>3</sup> Department of Preventive Medicine, College of Medicine, Chosun University, Gwangju, Republic of Korea.

<sup>4</sup> Department of Pediatrics, Yonsei University College of Medicine, Seoul, Republic of Korea.

*Received for publication February 9, 2006; accepted for publication March 24, 2006.*

Childhood obesity is directly related to cardiovascular disease (CVD) risk factors, but there is limited information on their relation in Korean children and adolescents. The authors investigated the association between obesity and CVD risk factors among 2,272 Korean boys and girls aged 10–18 years, who participated in the Korean National Health and Nutrition Examination Survey in 1998 and 2001. Obesity was defined by body mass index cutoff points provided by the US Centers for Disease Control and Prevention. The prevalence of obesity increased significantly from 5.4% in 1998 to 11.3% in 2001 ( $p < 0.0001$ ). Korean obese children and adolescents in 1998 and 2001 had 4.6- and 4.9-fold risks for systolic hypertension, 4.2- and 2.8-fold risks for high levels of total cholesterol, 9.4- and 2.7-fold risks for high levels of low density lipoprotein cholesterol, 4.1- and 3.7-fold risks for low levels of high density lipoprotein cholesterol, and 5.3- and 2.8-fold risks for high levels of triglycerides, compared with their normal-weight counterparts ( $p < 0.05$  in all). Approximately 60% of Korean obese children and adolescents had at least one CVD risk factor. These findings suggest that Korean obese children and adolescents have an increased risk of CVD.

adolescent; cardiovascular diseases; child; Korea; obesity; risk factors

Abbreviations: CVD, cardiovascular disease; HDL, high density lipoprotein; KNHANES, Korean National Health and Nutrition Examination Survey; LDL, low density lipoprotein.

The increasing prevalence of childhood obesity is a worldwide trend and is becoming a significant public health problem (1). Obesity in children and adolescents is associated with various cardiovascular disease (CVD) risk factors, including hypertension, dyslipidemia, and elevated insulin levels (2–4), as well as an increased risk of CVD morbidity and mortality in adulthood (5, 6). A decrease in physical activity and an increase in caloric intake may be responsible for this increasing incidence (7). Therefore, lifestyle modification and weight control aimed at both preventing and

treating childhood obesity should reduce the risk of CVD in adulthood (2, 8).

Among Korean adults aged at least 20 years in 2001, 32.6 percent of males and 29.4 percent of females are obese, as defined by a body mass index of 25 or more  $\text{kg/m}^2$ , and the prevalence of obese adults has increased (9). In addition, the mortality from CVD was one of the leading causes of death in 2003 in Korea (10). Strong linear relations between body mass index and hypertension, type 2 diabetes mellitus, dyslipidemia, ischemic heart disease, and stroke in Korean

Reprint requests to Dr. Jong Park, Department of Preventive Medicine, College of Medicine, Chosun University, 375 Seoseok-dong, Dong-gu, Gwangju 501-759, Republic of Korea (e-mail: jpark@chosun.ac.kr).

adults have been reported (11–14). Obesity is a serious public health problem in Korean adults. However, little information is available regarding the association between obesity and CVD risk factors in Korean children and adolescents. The purpose of this study was to estimate the prevalence of hypertension, dyslipidemia, and elevated fasting glucose and to determine the association between obesity and CVD risk factors in Korean children and adolescents.

## MATERIALS AND METHODS

### Study population

This study was based on the data obtained from the Korean National Health and Nutrition Examination Survey (KNHANES) among noninstitutionalized civilians in the Republic of Korea (referred to as “South Korea”), which was conducted by the Korean Ministry of Health and Welfare in 1998 and 2001. This survey is a nationwide representative study using a stratified, multistage probability sampling design for the selection of household units. The participants completed three parts of a questionnaire belonging to the Health Interview Survey, the Health Behavior Survey, and the Nutrition Survey, and they underwent a Health Examination Survey. Subjects aged 10–18 years numbered 1,651 in 1998 and 1,158 in 2001. Subjects who did not fast for at least 8 hours or had one missing measurement were excluded. The final sample population for analysis consisted of 1,412 and 860 subjects in 1998 and 2001, respectively.

### Health Examination Survey

Height was measured with a stadiometer, and body weight was measured on a balanced scale. Body mass index (weight (kg)/height (m)<sup>2</sup>) was calculated. Waist circumference was measured at the midpoint between the bottom of the rib cage and the top of the lateral border of iliac crest during minimal respiration. Blood pressure was measured by use of a mercury sphygmomanometer. Two measurements were made on all subjects at 5-minute intervals. The first and fifth Korotkoff sounds represented the systolic and diastolic blood pressure, respectively. The average of two measurements was used in data analysis.

Blood samples were collected in the morning after the subjects had fasted overnight and were analyzed in a national central laboratory. Serum total cholesterol, triglycerides, high density lipoprotein (HDL) cholesterol, and plasma fasting glucose were measured by use of enzymatic techniques. Low density lipoprotein (LDL) cholesterol was calculated by use of the Friedewald equation if the triglyceride measurement was less than 400 mg/dl (15).

### Definition of overweight and CVD risk factors

Overweight status in childhood and adolescence was defined according to the body mass index cutoff points for age and gender proposed by the US Centers for Disease Control and Prevention (16). Subjects were classified as normal weight (<85th percentile), at risk of overweight (85th–<95th percentile), or overweight (≥95th percentile) accord-

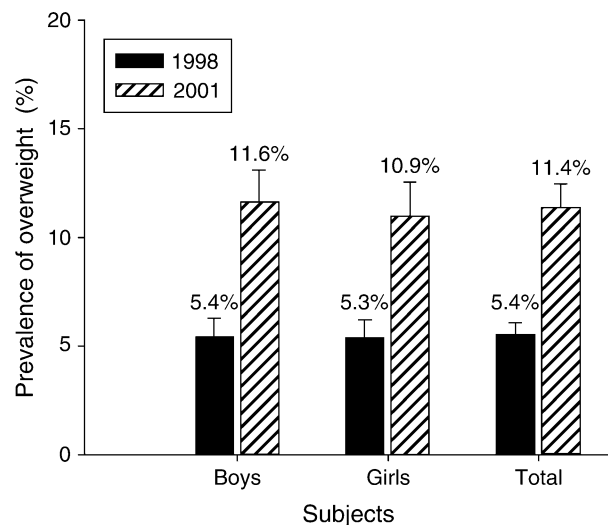

**FIGURE 1.** Prevalence of overweight among boys and girls aged 10–18 years, Korean National Health and Nutrition Examination Survey, 1998 and 2001.

ing to the Korean growth charts (17). Hypertension was defined as a systolic blood pressure or a diastolic blood pressure greater than or equal to the 95th percentile for age, gender, and height (18, 19). A total cholesterol concentration of 200 mg/dl or more, a LDL cholesterol concentration of 130 mg/dl or more, and a triglyceride concentration of 130 mg/dl or more were defined as high (20). A low HDL cholesterol level and a high fasting glucose level were defined as a concentration of less than 35 mg/dl (21) and a concentration of 110 mg/dl or more, respectively.

### Statistical analysis

The data were analyzed by use of SPSS software, version 11 for Windows (SPSS, Inc., Chicago, Illinois). Comparison of means of variables among the three groups stratified according to overweight status was done by analysis of variance with post hoc analysis (two sided). The chi-square test was used to examine differences in the prevalence of CVD risk factors between 1998 and 2001. The linear-by-linear association method was used for the trend test between overweight status and prevalence of CVD risk factors. Logistic regression analysis was used to examine the associations between overweight and CVD risk factors, and the referent was the normal-weight group.  $p < 0.05$  was considered significant.

## RESULTS

The prevalence of overweight boys increased significantly from 5.4 percent in 1998 to 11.6 percent in 2001 ( $p < 0.0001$ ), while the prevalence of overweight girls increased significantly from 5.3 percent in 1998 to 10.9 percent in 2001 ( $p = 0.001$ ) (figure 1). Characteristics of the subjects classified by overweight status were displayed in table 1

**TABLE 1. Characteristics (mean (standard deviation)) of 1,412 subjects aged 10–18 years according to overweight status, Korean National Health and Nutrition Examination Survey, 1998**

| Variable                             | Normal weight<br>(622 boys,<br>554 girls) | At risk of<br>overweight<br>(74 boys,<br>86 girls) | Overweight<br>(40 boys,<br>36 girls) | <i>p</i> value for<br>difference<br>(ANOVA*) |
|--------------------------------------|-------------------------------------------|----------------------------------------------------|--------------------------------------|----------------------------------------------|
| Age (years)                          |                                           |                                                    |                                      |                                              |
| Boys                                 | 13.9 (2.5)                                | 14.1 (2.7)                                         | 13.9 (3.0)                           | 0.841                                        |
| Girls                                | 14.3 (2.6)                                | 14.6 (2.6)                                         | 13.4 (2.8)                           | 0.080                                        |
| Body mass index (kg/m <sup>2</sup> ) |                                           |                                                    |                                      |                                              |
| Boys                                 | 18.8 (2.3)                                | 24.3 (1.6)                                         | 27.8 (2.4)                           | <0.0001                                      |
| Girls                                | 18.9 (2.2)                                | 23.9 (1.4)                                         | 26.2 (1.8)                           | <0.0001                                      |
| Systolic blood pressure (mmHg)       |                                           |                                                    |                                      |                                              |
| Boys                                 | 114.0 (11.2)                              | 120.5 (11.6)                                       | 123.6 (10.9)                         | <0.0001                                      |
| Girls                                | 111.3 (10.0)                              | 114.1 (10.4)                                       | 116.4 (8.5)                          | 0.001                                        |
| Diastolic blood pressure (mmHg)      |                                           |                                                    |                                      |                                              |
| Boys                                 | 65.0 (14.0)                               | 66.9 (14.7)                                        | 70.1 (12.0)                          | 0.056                                        |
| Girls                                | 66.0 (23.4)                               | 65.8 (12.4)                                        | 68.0 (10.6)                          | 0.860                                        |
| Total cholesterol (mg/dl)            |                                           |                                                    |                                      |                                              |
| Boys                                 | 154.1 (26.8)                              | 160.9 (27.0)                                       | 176.6 (31.4)                         | <0.0001                                      |
| Girls                                | 165.3 (28.6)                              | 166.4 (27.8)                                       | 172.2 (38.3)                         | 0.381                                        |
| LDL* cholesterol (mg/dl)             |                                           |                                                    |                                      |                                              |
| Boys                                 | 84.6 (21.8)                               | 94.2 (23.3)                                        | 105.5 (29.3)                         | <0.0001                                      |
| Girls                                | 93.0 (25.7)                               | 98.0 (22.6)                                        | 103.2 (33.4)                         | 0.026                                        |
| HDL* cholesterol (mg/dl)             |                                           |                                                    |                                      |                                              |
| Boys                                 | 54.0 (12.0)                               | 46.6 (9.1)                                         | 47.6 (9.4)                           | <0.0001                                      |
| Girls                                | 54.7 (11.5)                               | 48.6 (11.0)                                        | 46.2 (10.1)                          | <0.0001                                      |
| Triglycerides (mg/dl)                |                                           |                                                    |                                      |                                              |
| Boys                                 | 77.7 (41.2)                               | 100.4 (41.5)                                       | 117.8 (51.1)                         | <0.0001                                      |
| Girls                                | 88.6 (40.3)                               | 100.0 (47.5)                                       | 114.2 (48.0)                         | <0.0001                                      |
| Fasting glucose (mg/dl)              |                                           |                                                    |                                      |                                              |
| Boys                                 | 94.7 (12.5)                               | 94.3 (12.1)                                        | 95.9 (13.5)                          | 0.813                                        |
| Girls                                | 92.4 (11.9)                               | 94.9 (12.4)                                        | 93.4 (10.2)                          | 0.174                                        |

\* ANOVA, analysis of variance; LDL, low density lipoprotein; HDL, high density lipoprotein.

and table 2 on the basis of results from KNHANES 1998 and 2001, respectively. The overweight boys in 1998 had a significantly higher mean systolic blood pressure measurement; higher mean concentrations of total cholesterol, LDL cholesterol, and triglycerides; and a lower mean concentration of HDL cholesterol than did their normal-weight counterparts (in all:  $p < 0.0001$ ). The overweight girls in 1998 had a significantly higher mean systolic blood pressure measurement ( $p = 0.001$ ), higher mean concentrations of LDL cholesterol ( $p = 0.026$ ) and triglycerides ( $p < 0.0001$ ), and a lower mean concentration of HDL cholesterol ( $p < 0.0001$ ) than did their normal-weight counterparts. The overweight boys in 2001 had a significantly higher mean systolic blood pressure measurement ( $p < 0.0001$ ); higher mean concentrations of total cholesterol ( $p < 0.0001$ ), LDL cholesterol ( $p = 0.001$ ), and triglycerides ( $p < 0.0001$ ); and a lower mean concentration of HDL cholesterol ( $p = 0.011$ ) than did their

normal-weight counterparts. The overweight girls in 2001 had a significantly higher mean systolic blood pressure measurement ( $p = 0.004$ ); higher mean concentrations of total cholesterol ( $p = 0.002$ ), LDL cholesterol ( $p = 0.004$ ), and triglycerides ( $p < 0.0001$ ); and a lower mean concentration of HDL cholesterol ( $p = 0.003$ ) than did their normal-weight counterparts. In both 1998 and 2001, the mean diastolic blood pressure measurement and the mean concentrations of fasting glucose were not statistically different between the overweight and normal-weight subjects.

The prevalence changes of CVD risk factors from 1998 to 2001 were given in table 3. For boys, the prevalence of high LDL cholesterol, low HDL cholesterol, and high triglycerides significantly increased from 1998 to 2001 ( $p = 0.029$ ,  $p < 0.001$ , and  $p < 0.001$ , respectively).

The prevalence of systolic hypertension, high total cholesterol, high LDL cholesterol, low HDL cholesterol, and

**TABLE 2. Characteristics (mean (standard deviation)) of 860 subjects aged 10–18 years according to overweight status, Korean National Health and Nutrition Examination Survey, 2001**

| Variable                             | Normal weight<br>(346 boys,<br>313 girls) | At risk of<br>overweight<br>(58 boys,<br>46 girls) | Overweight<br>(53 boys,<br>44 girls) | <i>p</i> value for<br>difference<br>(ANOVA*) |
|--------------------------------------|-------------------------------------------|----------------------------------------------------|--------------------------------------|----------------------------------------------|
| Age (years)                          |                                           |                                                    |                                      |                                              |
| Boys                                 | 13.6 (2.4)                                | 13.7 (2.3)                                         | 13.3 (2.7)                           | 0.623                                        |
| Girls                                | 13.9 (2.4)                                | 14.4 (2.7)                                         | 12.6 (2.5)                           | 0.001                                        |
| Body mass index (kg/m <sup>2</sup> ) |                                           |                                                    |                                      |                                              |
| Boys                                 | 19.1 (2.2)                                | 24.5 (1.6)                                         | 28.0 (3.2)                           | <0.0001                                      |
| Girls                                | 19.1 (2.2)                                | 23.6 (1.6)                                         | 25.6 (2.5)                           | <0.0001                                      |
| Systolic blood pressure (mmHg)       |                                           |                                                    |                                      |                                              |
| Boys                                 | 111.8 (11.5)                              | 116.6 (10.5)                                       | 120.0 (11.0)                         | <0.0001                                      |
| Girls                                | 106.1 (10.0)                              | 107.5 (10.2)                                       | 111.5 (11.0)                         | 0.004                                        |
| Diastolic blood pressure (mmHg)      |                                           |                                                    |                                      |                                              |
| Boys                                 | 64.5 (11.9)                               | 66.7 (10.7)                                        | 68.1 (12.2)                          | 0.065                                        |
| Girls                                | 63.7 (10.0)                               | 63.8 (10.4)                                        | 64.1 (10.6)                          | 0.971                                        |
| Total cholesterol (mg/dl)            |                                           |                                                    |                                      |                                              |
| Boys                                 | 155.4 (26.4)                              | 171.0 (23.9)                                       | 169.7 (30.9)                         | <0.0001                                      |
| Girls                                | 165.6 (25.5)                              | 172.9 (29.4)                                       | 179.1 (24.8)                         | 0.002                                        |
| LDL* cholesterol (mg/dl)             |                                           |                                                    |                                      |                                              |
| Boys                                 | 91.1 (22.3)                               | 100.4 (23.2)                                       | 101.0 (26.6)                         | 0.001                                        |
| Girls                                | 97.1 (22.2)                               | 104.6 (24.3)                                       | 107.5 (21.9)                         | 0.004                                        |
| HDL* cholesterol (mg/dl)             |                                           |                                                    |                                      |                                              |
| Boys                                 | 46.5 (9.6)                                | 45.5 (8.4)                                         | 42.2 (8.4)                           | 0.011                                        |
| Girls                                | 50.2 (9.5)                                | 47.0 (8.4)                                         | 45.8 (9.5)                           | 0.003                                        |
| Triglycerides (mg/dl)                |                                           |                                                    |                                      |                                              |
| Boys                                 | 89.7 (46.7)                               | 125.4 (84.4)                                       | 138.5 (93.4)                         | <0.0001                                      |
| Girls                                | 91.4 (42.8)                               | 106.7 (56.8)                                       | 129.3 (71.0)                         | <0.0001                                      |
| Fasting glucose (mg/dl)              |                                           |                                                    |                                      |                                              |
| Boys                                 | 94.6 (12.1)                               | 95.6 (10.5)                                        | 97.7 (11.6)                          | 0.183                                        |
| Girls                                | 93.6 (11.8)                               | 92.0 (12.1)                                        | 93.7 (8.7)                           | 0.668                                        |

\* ANOVA, analysis of variance; LDL, low density lipoprotein; HDL, high density lipoprotein.

high triglycerides increased in a graded fashion from the normal-weight group to the overweight group in both 1998 and 2001 (in all:  $p_{\text{trend}} < 0.05$ ) (table 4). The age- and gender-adjusted odds ratios for systolic hypertension, high total cholesterol, high LDL cholesterol, low HDL cholesterol, and high triglycerides were highest in the overweight group in both 1998 and 2001 (table 4). In 1998, the overweight children and adolescents showed a strong association with systolic hypertension, diastolic hypertension, high total cholesterol, high LDL cholesterol, low HDL cholesterol, and high triglycerides (age- and gender-adjusted odds ratio = 4.55, 2.65, 4.15, 9.42, 4.10, and 5.30, respectively). In 2001, the overweight children and adolescents showed a strong association with systolic hypertension, high total cholesterol, high LDL cholesterol, low HDL cholesterol, and high triglycerides (age- and gender-adjusted odds ratio = 4.94, 2.78, 2.67, 3.64, and 2.77, respectively).

The clustering of CVD risk factors was shown in Korean obese children and adolescents (table 5). Among the overweight subjects, 65.8 percent in 1998 and 63.2 percent in 2001 had at least one of the significant five CVD risk factors, while 24.3 percent in 1998 and 28.6 percent in 2001 among normal-weight subjects had at least one significant CVD risk factor.

## DISCUSSION

The present study demonstrated that Korean overweight children and adolescents aged 10–18 years had more elevated blood pressure, more adverse lipid levels, and more clustered numbers of CVD risk factors than did normal-weight counterparts. In addition, a significant increase of overweight during a short period was observed. These findings were consistent

**TABLE 3. Prevalence of cardiovascular disease risk factors among subjects aged 10–18 years, Korean National Health and Nutrition Examination Survey, 1998 and 2001**

| Cardiovascular disease risk factors | KNHANES,* 1998<br>(736 boys,<br>676 girls) |      | KNHANES, 2001<br>(457 boys,<br>403 girls) |      | <i>p</i> value for difference† |
|-------------------------------------|--------------------------------------------|------|-------------------------------------------|------|--------------------------------|
|                                     | No.                                        | %    | No.                                       | %    |                                |
| Systolic hypertension               |                                            |      |                                           |      |                                |
| Boys                                | 83                                         | 11.3 | 43                                        | 9.4  | 0.307                          |
| Girls                               | 66                                         | 9.8  | 23                                        | 5.7  | 0.019                          |
| Diastolic hypertension              |                                            |      |                                           |      |                                |
| Boys                                | 46                                         | 6.3  | 19                                        | 4.2  | 0.122                          |
| Girls                               | 42                                         | 6.2  | 10                                        | 2.5  | 0.006                          |
| High total cholesterol              |                                            |      |                                           |      |                                |
| Boys                                | 49                                         | 6.7  | 36                                        | 7.9  | 0.421                          |
| Girls                               | 71                                         | 10.5 | 45                                        | 11.2 | 0.734                          |
| High LDL* cholesterol               |                                            |      |                                           |      |                                |
| Boys                                | 33                                         | 4.5  | 34                                        | 7.5  | 0.029                          |
| Girls                               | 52                                         | 7.7  | 36                                        | 8.9  | 0.091                          |
| Low HDL* cholesterol                |                                            |      |                                           |      |                                |
| Boys                                | 24                                         | 3.3  | 38                                        | 8.3  | <0.001                         |
| Girls                               | 25                                         | 3.7  | 17                                        | 4.2  | 0.476                          |
| High triglycerides                  |                                            |      |                                           |      |                                |
| Boys                                | 81                                         | 11.0 | 88                                        | 19.3 | <0.001                         |
| Girls                               | 107                                        | 15.8 | 80                                        | 19.9 | 0.669                          |
| High fasting glucose                |                                            |      |                                           |      |                                |
| Boys                                | 66                                         | 9.0  | 42                                        | 9.2  | 0.896                          |
| Girls                               | 50                                         | 7.4  | 24                                        | 6.0  | 0.365                          |

\* KNHANES, Korean National Health and Nutrition Examination Survey; LDL, low density lipoprotein; HDL, high density lipoprotein.

† Chi-square test.

with the data reported in other studies (2, 22–24). However, caution should be taken when comparing the data with other results, because different definitions for overweight status and CVD risk factors are used. Herein, overweight was used interchangeably with obesity, similar to a majority of US studies (2, 17, 22).

Elevated blood pressure is more frequently present in overweight children than in nonoverweight children (25). The present study showed a similar finding on systolic blood pressure, but there was no significant association between overweight and diastolic blood pressure in 2001. In the Bogalusa Heart Study, overweight schoolchildren (body mass index:  $\geq 95$ th percentile) have 2.4-fold risk of diastolic hypertension (2). In a German study, the degree of body mass index correlates positively with diastolic hypertension (24). The decreasing prevalence of diastolic hypertension from 1998 to 2001, as well as the smaller size of sample population in 2001 than in 1998, might be one reason for a different finding on diastolic hypertension.

Overweight is strongly related to concentrations of HDL cholesterol and triglycerides and weakly related to concentrations of total and LDL cholesterol (2). In a German study,

total and LDL cholesterol concentrations did not correlate significantly with the degree of overweight (24). In the present study, all types of lipids were significantly associated with overweight.

In contrast to blood pressure and lipid profiles, fasting glucose concentrations did not increase according to the increase in overweight status. However, in the Taipei Children Heart Study, a significant correlation between obesity (body mass index:  $\geq 85$ th percentile) and high fasting glucose ( $\geq 90$ th percentile) is reported (23). The small number of overweight subjects and very low prevalence of high fasting glucose made these findings statistically insignificant.

The fasting plasma insulin level is a proper measure of insulin resistance and has a significant relation with obesity and CVD (4, 26). In the Young Finns Study (27), the serum insulin concentration correlates positively with body mass index. In the Bogalusa Heart Study, overweight schoolchildren were found to have a 2.4-fold risk for high fasting plasma insulin (2). However, fasting plasma insulin was not measured in the Health Examination Survey of KNHANES. The relation between fasting plasma insulin and overweight is suggested indirectly through another Korean study where

**TABLE 4. Prevalence and age- and gender-adjusted odds ratios for cardiovascular disease risk factors in subjects aged 10–18 years, Korean National Health and Nutrition Examination Survey, 1998 and 2001**

| Cardiovascular disease risk factors | Normal weight, prevalence (%) | At risk of overweight |            |                         | Overweight     |            |                         |
|-------------------------------------|-------------------------------|-----------------------|------------|-------------------------|----------------|------------|-------------------------|
|                                     |                               | Prevalence (%)        | Odds ratio | 95% confidence interval | Prevalence (%) | Odds ratio | 95% confidence interval |
| Systolic hypertension               |                               |                       |            |                         |                |            |                         |
| 1998                                | 9.1                           | 20.0                  | 2.95       | 1.89, 4.59              | 28.9*          | 4.55       | 2.65, 7.81              |
| 2001                                | 5.2                           | 9.6                   | 2.01       | 0.95, 4.24              | 22.7*          | 4.94       | 2.72, 8.97              |
| Diastolic hypertension              |                               |                       |            |                         |                |            |                         |
| 1998                                | 5.4                           | 8.8                   | 1.66       | 0.91, 3.03              | 13.2*          | 2.65       | 1.30, 5.41              |
| 2001                                | 3.2                           | 3.8                   | 1.18       | 0.40, 3.51              | 4.1            | 1.35       | 0.45, 4.04              |
| High total cholesterol              |                               |                       |            |                         |                |            |                         |
| 1998                                | 7.1                           | 11.3                  | 1.58       | 0.92, 2.71              | 23.7*          | 4.15       | 2.33, 7.40              |
| 2001                                | 7.3                           | 14.4                  | 2.23       | 1.20, 4.17              | 18.6*          | 2.78       | 1.53, 5.05              |
| High LDL† cholesterol               |                               |                       |            |                         |                |            |                         |
| 1998                                | 4.3                           | 8.1                   | 1.81       | 0.96, 3.43              | 27.6*          | 9.42       | 5.21, 17.04             |
| 2001                                | 6.5                           | 11.5                  | 1.88       | 0.96, 3.71              | 15.8*          | 2.67       | 1.41, 5.05              |
| Low HDL† cholesterol                |                               |                       |            |                         |                |            |                         |
| 1998                                | 2.5                           | 8.1                   | 3.43       | 1.74, 6.75              | 9.2*           | 4.10       | 1.73, 9.71              |
| 2001                                | 4.9                           | 8.7                   | 1.77       | 0.81, 3.85              | 14.4*          | 3.64       | 1.84, 7.21              |
| High triglycerides                  |                               |                       |            |                         |                |            |                         |
| 1998                                | 10.4                          | 23.1                  | 2.58       | 1.70, 3.91              | 38.2*          | 5.30       | 3.20, 8.77              |
| 2001                                | 15.6                          | 29.8                  | 2.35       | 1.47, 3.77              | 35.1*          | 2.77       | 1.73, 4.44              |
| High fasting glucose                |                               |                       |            |                         |                |            |                         |
| 1998                                | 8.2                           | 9.4                   | 1.18       | 0.67, 2.10              | 5.3            | 0.61       | 0.22, 1.69              |
| 2001                                | 7.7                           | 5.8                   | 0.74       | 0.31, 1.78              | 9.3            | 1.10       | 0.52, 2.32              |

\*  $p < 0.05$  (trend in prevalence according to overweight status using linear-by-linear association).  
† LDL, low density lipoprotein; HDL, high density lipoprotein.

**TABLE 5. Prevalence of clustering of cardiovascular disease risk factors according to overweight status among subjects aged 10–18 years, Korean National Health and Nutrition Examination Survey, 1998 and 2001**

| No. of significant risk factors* | Normal weight |      | At risk of overweight |      | Overweight |      |
|----------------------------------|---------------|------|-----------------------|------|------------|------|
|                                  | No.           | %    | No.                   | %    | No.        | %    |
| 0                                |               |      |                       |      |            |      |
| 1998                             | 889           | 75.7 | 88                    | 55.0 | 26         | 34.2 |
| 2001                             | 470           | 71.4 | 56                    | 53.8 | 35         | 36.8 |
| ≥1                               |               |      |                       |      |            |      |
| 1998                             | 286           | 24.3 | 72                    | 45.0 | 50         | 65.8 |
| 2001                             | 188           | 28.6 | 48                    | 46.2 | 60         | 63.2 |
| ≥2                               |               |      |                       |      |            |      |
| 1998                             | 72            | 6.1  | 29                    | 18.1 | 29         | 38.2 |
| 2001                             | 61            | 9.3  | 25                    | 24.0 | 25         | 26.3 |
| ≥3                               |               |      |                       |      |            |      |
| 1998                             | 20            | 1.7  | 11                    | 6.9  | 13         | 17.1 |
| 2001                             | 9             | 1.4  | 4                     | 3.8  | 9          | 9.5  |

\* Significant cardiovascular disease risk factors: systolic hypertension; high levels of triglycerides and low density lipoprotein cholesterol; and low levels of high density lipoprotein cholesterol.

the mean concentration of fasting plasma insulin is significantly higher in overweight children than in normal-weight controls (28).

There were two limitations in the present study. First, because there are no formal cutoff points of blood pressure for age, gender, and height to define hypertension for Korean children and adolescents, the present study used US cutoff points after stratifying them into Korean height percentiles (16, 18). This was based on the assumption that there is no significant difference in blood pressure among ethnic groups during childhood and adolescence (29). Fortunately, the present study showed a significant association between systolic hypertension and overweight, which was consistent with results from other studies (2, 23, 24). The second limitation is that these results might not be representative of Korean children and adolescents. Although KNHANES used a stratified and multistage probability sampling design to estimate the representative indices in Koreans, the population distribution of the present study was slightly different from that of the original subjects in KNHANES because of the exclusion of subjects with missing values on the variables for logistic regression testing.

In summary, the numbers of overweight Korean children and adolescents have increased rapidly, and they have an

increased risk of elevated blood pressure; high concentrations of total cholesterol, LDL cholesterol, and triglycerides; and a low concentration of HDL cholesterol. These findings suggest that overweight Korean children and adolescents might have an increased risk of CVD morbidity and mortality in adulthood.

## ACKNOWLEDGMENTS

Conflict of interest: none declared.

## REFERENCES

1. Ebbeling CA, Pawlak DB, Ludwig DS. Childhood obesity: public-health crisis, common sense cure. *Lancet* 2002;360:473–82.
2. Freedman DS, Dietz WH, Srinivasan SR, et al. The relation of overweight to cardiovascular risk factors among children and adolescents: the Bogalusa Heart Study. *Pediatrics* 1999;103:1175–82.
3. Berenson GS, Srinivasan SR, Bao W, et al. Association between multiple cardiovascular risk factors and atherosclerosis in children and young adults. *N Eng J Med* 1998;338:1650–6.
4. Bao W, Srinivasan SR, Berenson GS. Persistent elevation of plasma insulin levels is associated with increased cardiovascular risk in children and young adults. The Bogalusa Heart Study. *Circulation* 1996;93:54–9.
5. Must A, Jacques PF, Dallal GE, et al. Long term morbidity and mortality of overweight adolescents: a follow-up of the Harvard Growth Study of 1922 to 1935. *N Eng J Med* 1992;327:1350–5.
6. Gunnell DJ, Frankel SJ, Nanchahal K, et al. Childhood obesity and adult cardiovascular mortality: a 57-y follow-up study based on the Boyd Orr cohort. *Am J Clin Nutr* 1998;67:1111–18.
7. Miller J, Rosenbloom A, Silverstein J. Childhood obesity. *J Clin Endocrinol Metab* 2004;89:4211–18.
8. Haffner SM, Valdez RA, Hazuda HP, et al. Prospective analysis of the insulin-resistance syndrome (syndrome X). *Diabetes* 1992;41:715–22.
9. Kim DM, Ahn CW, Nam SY. Prevalence of obesity in Korea. *Obes Rev* 2005;6:117–21.
10. Korea National Statistical Office. 2003 report of statistics of mortality in Koreans. (In Korean). Daejeon, Republic of Korea: Korea National Statistical Office, 2004.
11. Moon OR, Kim NS, Jang SM, et al. The relationship between body mass index and the prevalence of obesity-related diseases based on the 1995 National Health Interview Survey in Korea. *Obes Rev* 2002;3:191–6.
12. Park HS, Yun YS, Park JY, et al. Obesity, abdominal obesity, and clustering of cardiovascular risk factors in South Korea. *Asia Pac J Clin Nutr* 2003;12:411–18.
13. Jee SH, Pastor-Barriuso R, Appel LJ, et al. Body mass index and incident ischemic heart disease in South Korean men and women. *Am J Epidemiol* 2005;162:42–8.
14. Song YM, Sung JH, Smith GD, et al. Body mass index and ischemic and hemorrhagic stroke. A prospective study in Korean men. *Stroke* 2004;35:831–6.
15. Friedewald WT, Levy RI, Fredrickson DS. Estimation of the concentration of low-density lipoprotein cholesterol in plasma, without use of the preparative ultracentrifuge. *Clin Chem* 1972;18:499–502.
16. Himes JH, Dietz WH. Guidelines for overweight in adolescent preventive services: recommendations from an expert committee. The Expert Committee on Clinical Guidelines for Overweight in Adolescent Preventive Services. *Am J Clin Nutr* 1994;59:307–16.
17. Committee on Health and Statistics, Korean Pediatrics Society. 1998 Korean physical growth standards for children and adolescents. (In Korean). Seoul, Republic of Korea: Guang Mun Publishing Company, 1999.
18. National High Blood Pressure Education Program Working Group on High Blood Pressure in Children and Adolescents. The fourth report on the diagnosis, evaluation, and treatment of high blood pressure in children and adolescents. *Pediatrics* 2004;114:555–76.
19. Agency for Technology and Standards. The Fifth National Anthropometric Survey of Korea. (In Korean). Seoul, Republic of Korea: Ministry of Commerce, Industry, and Energy, 2004.
20. National Cholesterol Education Program. Report of the Expert Panel on Blood Cholesterol Levels in Children and Adolescents. Bethesda, MD: National Institutes of Health, 1991. (DHHS publication no. (NIH) 91-2732).
21. Committee on Nutrition, American Academy of Pediatrics. Cholesterol in childhood. *Pediatrics* 1998;101:141–7.
22. Freedman DS, Khan LK, Dietz WH, et al. Relationship of childhood obesity to coronary heart disease risk factors in adulthood: the Bogalusa Heart Study. *Pediatrics* 2001;108:712–18.
23. Chu NF, Rimm EB, Wang DJ, et al. Clustering of cardiovascular disease risk factors among obese schoolchildren: the Taipei Children Heart Study. *Am J Clin Nutr* 1998;67:1141–6.
24. Reinehr T, Andler W, Denzer C, et al. Cardiovascular risk factors in overweight German children and adolescents: relation to gender, age and degree of overweight. *Nutr Metab Cardiovasc Dis* 2005;15:181–7.
25. Styne DM. Childhood and adolescent obesity. Prevalence and significance. *Pediatr Clin North Am* 2001;48:823–54.
26. Williams CL, Hayman LL, Daniels SR, et al. Cardiovascular health in childhood: a statement for health professionals from the Committee on Atherosclerosis, Hypertension, and Obesity in the Young (AHOY) of the Council on Cardiovascular Disease in the Young, American Health Association. *Circulation* 2002;106:143–60.
27. Akerblom HK, Viikari J, Raitakari OT, et al. Cardiovascular risk in Young Finns Study: general outline and recent developments. *Ann Med* 1999;31(suppl 1):45–54.
28. Cho SJ, Park SJ, Hwang IT, et al. Risk factors for cardiovascular disease in obese children. (In Korean). *J Korean Pediatr Soc* 2001;44:493–500.
29. Rosner B, Prineas R, Daniels SR, et al. Blood pressure differences between Blacks and Whites in relation to body size among US children and adolescents. *Am J Epidemiol* 2000;151:1007–19.
